# Supplementary material for: Photomagnetic properties of iron(ii) spin crossover complexes of 2,6-dipyrazolylpyridine and 2,6-dipyrazolylpyrazine ligands
Source: Royal Society of Chemistry journal article supplement (doi:10.1039/b601366j), 2006-01-01
Supplement: b601366j.pdf [file b601366j.pdf]

## Photomagnetic properties of iron(II) spin crossover complexes of 2,6-dipyrazolylpyridine and 2,6-dipyrazolylpyrazine ligands

Chiara Carbonera,<sup>a</sup> José Sánchez Costa,<sup>a</sup> Victoria A. Money,<sup>b</sup> Jérôme Elhaïk,<sup>c</sup> Judith A.K. Howard,<sup>\*b</sup> Malcolm A. Halcrow<sup>\*c</sup> and Jean-François Létard<sup>\*a</sup>

<sup>a</sup> Institut de Chimie de la Matière Condensée de Bordeaux, UPR CNRS 9048 - Université Bordeaux 1, Groupe des Sciences Moléculaires, 87 Av. Doc. A. Schweitzer, F-33608 Pessac, France.

Email: letard@icmcb-bordeaux.cnrs.fr

<sup>b</sup> Department of Chemistry, University of Durham, South Road, Durham, U.K. DH1 3LE.

Email: j.a.k.howard@durham.ac.uk.

<sup>c</sup> School of Chemistry, University of Leeds, Woodhouse Lane, Leeds, U.K. LS2 9JT.

Email: m.a.halcrow@leeds.ac.uk

The photomagnetic properties of the following iron(II) complexes have been investigated:  $[\text{Fe}(\text{L}^1)_2][\text{BF}_4]_2$  (**1**),  $[\text{Fe}(\text{L}^2)_2][\text{BF}_4]_2$  (**2**),  $[\text{Fe}(\text{L}^2)_2][\text{ClO}_4]_2$  (**3**),  $[\text{Fe}(\text{L}^3)_2][\text{BF}_4]_2$  (**4**),  $[\text{Fe}(\text{L}^3)_2][\text{ClO}_4]_2$  (**5**) and  $[\text{Fe}(\text{L}^4)_2][\text{ClO}_4]_2$  (**6**) ( $\text{L}^1 = 2,6\text{-di}\{\text{pyrazol-1-yl}\}\text{pyridine}$ ;  $\text{L}^2 = 2,6\text{-di}\{\text{pyrazol-1-yl}\}\text{pyrazine}$ ;  $\text{L}^3 = 2,6\text{-di}\{\text{pyrazol-1-yl}\}\text{-4-}\{\text{hydroxymethyl}\}\text{pyridine}$ ; and  $\text{L}^4 = 2,6\text{-di}\{4\text{-methylpyrazol-1-yl}\}\text{pyridine}$ ). Compounds **1-6** display a complete thermal spin transition centred between 200-300 K, and undergo the light-induced excited spin state trapping (LIESST) effect at low temperatures. The  $T(\text{LIESST})$  relaxation temperature of the photoinduced high-spin state for each compound has been determined. The presence of sigmoidal kinetics in the HS $\rightarrow$ LS relaxation process, and the observation of LITH hysteresis loops under constant irradiation, demonstrate the cooperative nature of the spin-transitions undergone by these materials. All the compounds in this study follow a previously proposed linear relation between  $T(\text{LIESST})$  and their thermal spin-transition temperatures  $T_{1/2}$ :  $T(\text{LIESST}) = T_0 - 0.3T_{1/2}$ .  $T_0$  for these compounds is identical to that found previously for another family of iron(II) complexes of a related tridentate ligand, the first time such a comparison has been made. Crystallographic characterisation of the high- and low-spin forms of **5** and **6**, the light-induced high-spin state of **5**, and the low-spin complex  $[\text{Fe}(\text{L}^4)_2][\text{BF}_4]_2$  (**7**), are described.

### Electronic Supplementary Information

**Fig. S1** View of the complex dication in the crystal structure of  $[\text{Fe}(\text{L}^4)_2][\text{BF}_4]_2 \cdot x\text{H}_2\text{O}$  ( $7 \cdot x\text{H}_2\text{O}$ ,  $x \approx 0.2$ ), with selected bond distances and angles.

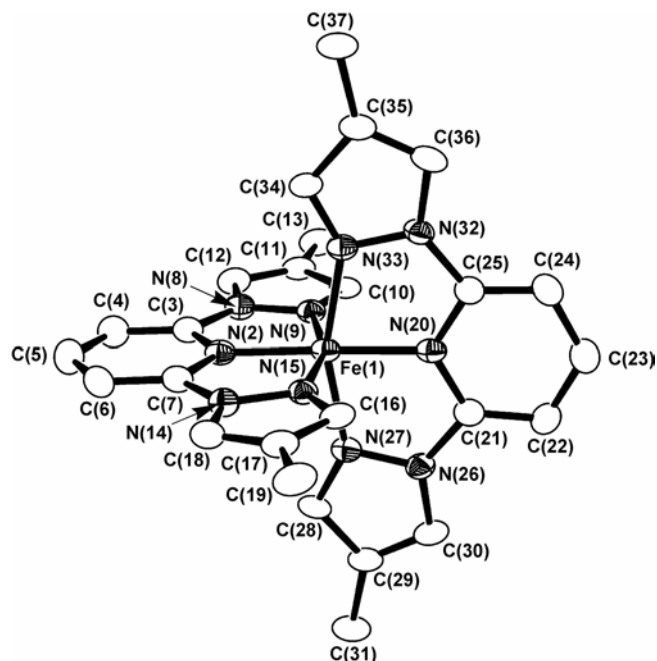

**Fig. S1** View of the complex dication in the crystal structure of  $[\text{Fe}(\text{L}^4)_2][\text{BF}_4]_2 \cdot x\text{H}_2\text{O}$  ( $7 \cdot x\text{H}_2\text{O}$ ,  $x \approx 0.2$ ). Thermal ellipsoids are at the 35% probability level, and all H atoms have been removed for clarity. Selected bond distances and angles ( $\text{\AA}$ ,  $^\circ$ ): Fe(1)–N(2) 1.892(3), Fe(1)–N(9) 1.964(3), Fe(1)–N(15) 1.968(3), Fe(1)–N(20) 1.888(3), Fe(1)–N(27) 1.972(2), Fe(1)–N(33) 1.971(3), N(2)–Fe(1)–N(9) 80.24(12), N(2)–Fe(1)–N(15) 80.51(11), N(2)–Fe(1)–N(20) 177.95(11), N(2)–Fe(1)–N(27) 98.99(11), N(2)–Fe(1)–N(33) 100.62(11), N(9)–Fe(1)–N(15) 160.74(12), N(9)–Fe(1)–N(20) 101.63(11), N(9)–Fe(1)–N(27) 91.84(10), N(9)–Fe(1)–N(33) 91.68(10), N(15)–Fe(1)–N(20) 97.63(11), N(15)–Fe(1)–N(27) 91.84(10), N(15)–Fe(1)–N(33) 91.16(10), N(20)–Fe(1)–N(27) 80.17(11), N(20)–Fe(1)–N(33) 80.22(11), N(27)–Fe(1)–N(33) 160.39(12).
